# Supplementary material for: Ordered growth of vanadyl phthalocyanine (VOPc) on an iron phthalocyanine (FePc) monolayer
Source: Royal Society of Chemistry journal article supplement (doi:10.1039/c5cp03724g), 2015-01-01
Supplement: c5cp03724g1.pdf [file c5cp03724g1.pdf]

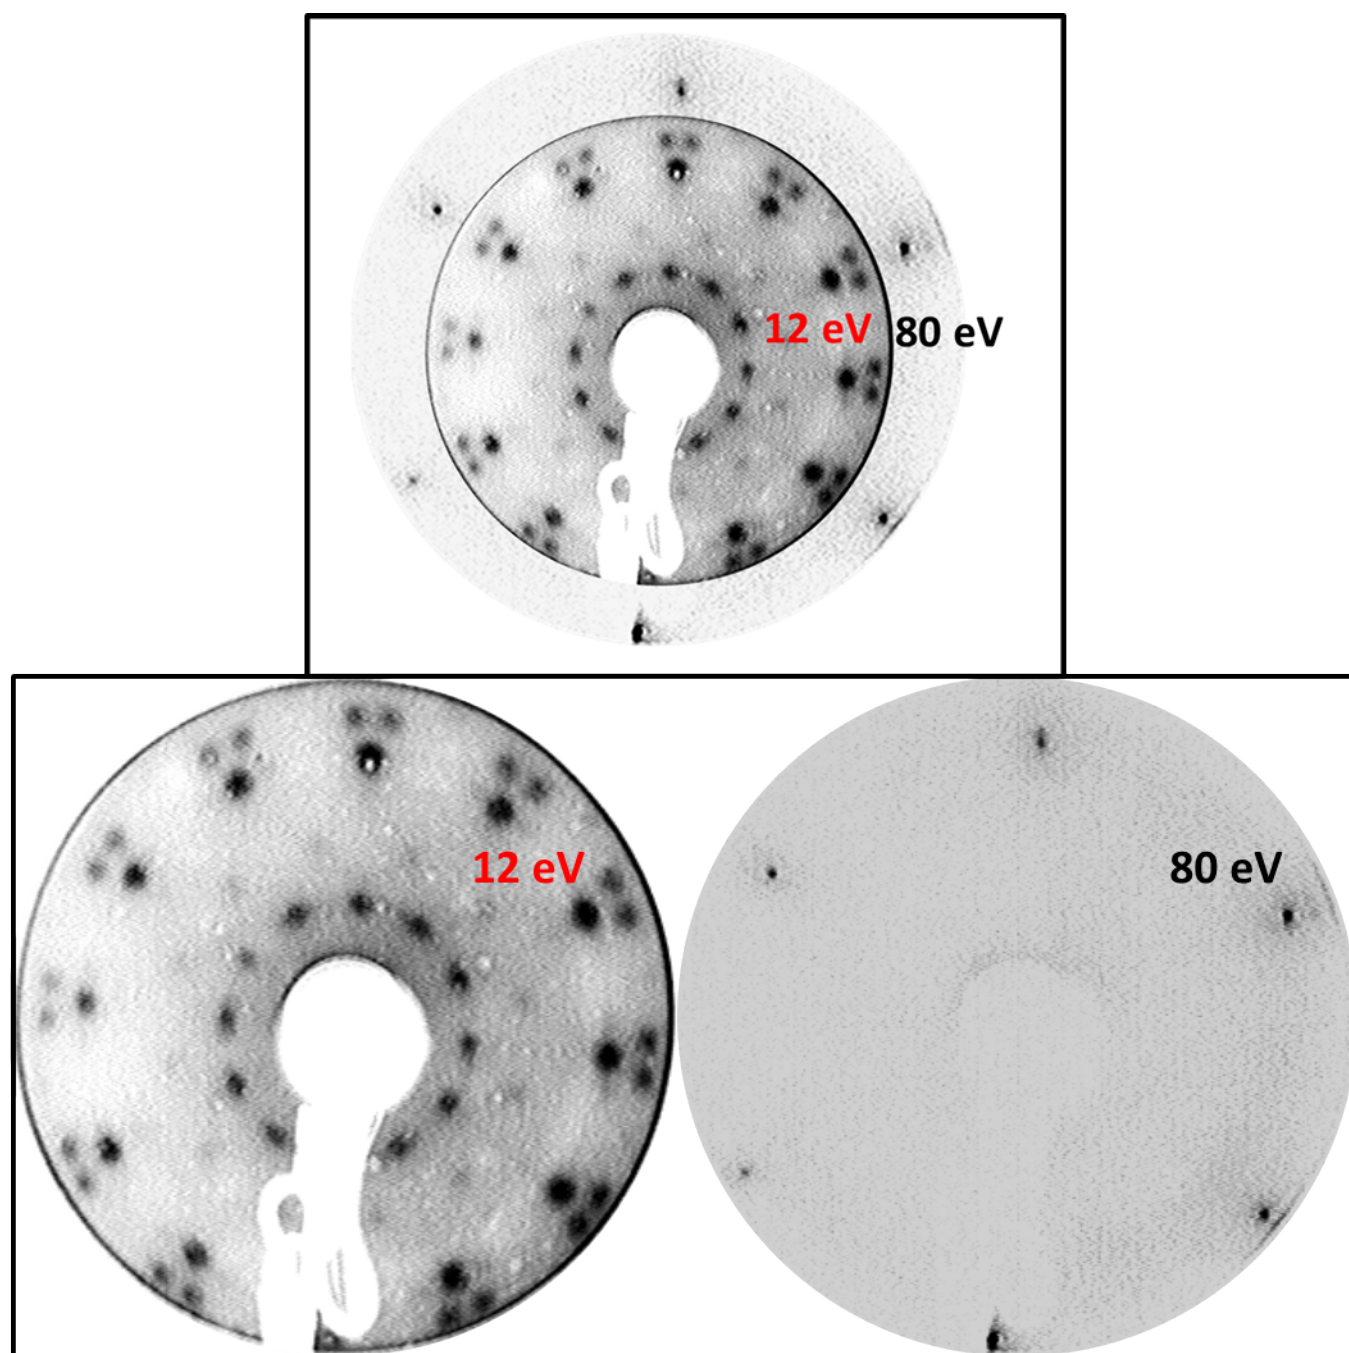

**Figure S1** – Nested LEED patterns (upper panel) of a clean Au (111) surface (outer, 80 eV) and 1 ML VOPc / Au (111) (inner, 12 eV), each pattern is reproduced individually in the lower panel.
